# Supplementary material for: Characterization of a Novel Double-Stranded RNA Virus from Phytophthora pluvialis in New Zealand
Source: MDPI journal article supplement (doi:10.3390/v14020247), 2022-01-26
Supplement: s1 [file s1]

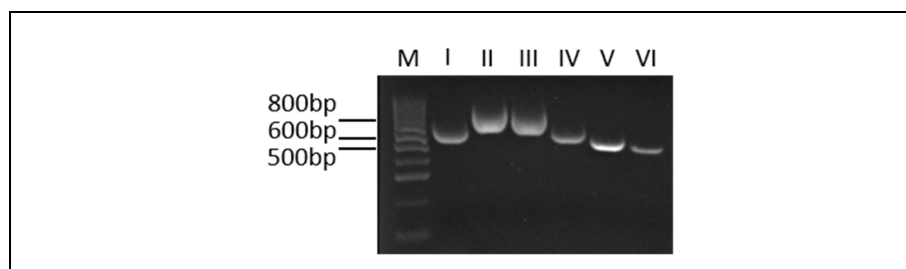

**Figure S1.** Agarose-gel electrophoresis of PpIRV1\_4018 dsRNA RT-PCR products. M: 1kb ladder; I-VI: RT-PCR amplicons obtained by primer walking.

**Table S1.** *Phytophthora pluvialis* isolates used for virus genome characterisation in this study. All *P. pluvialis* isolates were sourced from Scion (Rotorua, New Zealand).

| Isolate   | Cluster <sup>1</sup> | Geographical location  | Host                         |
|-----------|----------------------|------------------------|------------------------------|
| NZFS 3000 | NZ2                  | Gisborne               | <i>Pinus radiata</i>         |
| NZFS 3046 | NZ1                  | Northland              | <i>Pinus radiata</i>         |
| NZFS 3052 | NZ1                  | Northland              | <i>Pinus radiata</i>         |
| NZFS 3132 | NZ1                  | Coromandel             | <i>Pinus radiata</i>         |
| NZFS 3440 | NZ1                  | Taupo                  | <i>Pinus radiata</i>         |
| NZFS 3447 | NZ1                  | Nelson                 | <i>Pinus radiata</i>         |
| NZFS 3564 | NZ1                  | Hawke's Bay            | <i>Pinus radiata</i>         |
| NZFS 3608 | NZ1                  | Northland              | <i>Pinus radiata</i>         |
| NZFS 3619 | NZ1                  | Nelson                 | <i>Pinus radiata</i>         |
| NZFS 3632 | NZ2                  | Bay of Plenty/Wanganui | <i>Pinus radiata</i>         |
| NZFS 3635 | NZ1                  | Nelson                 | <i>Pinus radiata</i>         |
| NZFS 3880 | NZ2                  | Wairarapa              | <i>Pseudotsuga menziesii</i> |
| NZFS 3894 | NZ1                  | Northland              | <i>Pinus radiata</i>         |
| NZFS 3990 | NZ1                  | Auckland               | <i>Pinus radiata</i>         |
| NZFS 3998 | NZ2                  | Coromandel             | <i>Pinus radiata</i>         |
| NZFS 4014 | NZ2                  | Gisborne               | <i>Pinus radiata</i>         |
| NZFS 4015 | NZ2*                 | Gisborne               | <i>Pinus radiata</i>         |
| NZFS 4016 | NZ2                  | Gisborne               | <i>Pinus radiata</i>         |
| NZFS 4017 | NZ2*                 | Gisborne               | <i>Pinus radiata</i>         |
| NZFS 4018 | NZ2                  | Gisborne               | <i>Pinus radiata</i>         |
| NZFS 4019 | NZ2                  | Gisborne               | <i>Pinus radiata</i>         |
| NZFS 4021 | NZ1                  | Northland              | <i>Pinus radiata</i>         |
| NZFS 4293 | NZ1                  | Taranaki               | <i>Pinus radiata</i>         |

<sup>1</sup> The cluster nomenclature was according to Tibima et al. (2021).

\*Isolate classification was based on the virus phylogenetic analysis referred to in **Figure 3**.

**Table S2.** A list of primers used for *Phytophthora pluvialis* RNA virus 1 (PplRV1) dsRNA sequencing and PplRV1 detection and diagnostics.

| Primer name          | Sequence (5' – 3')    | Position (nt) | Purpose                             |
|----------------------|-----------------------|---------------|-------------------------------------|
| SEQ31 <sup>1</sup>   | CCATCGTCTTGGCCTATG    | 31-48         | Sequencing primer, detection primer |
| SEQ997 <sup>1</sup>  | GATTCGTCTCGATGTCCC    | 1,014-997     | Sequencing primer                   |
| SEQ718 <sup>1</sup>  | CGCGACAGAGTTTTTACG    | 718-735       | Sequencing primer                   |
| SEQ1566 <sup>1</sup> | GGTCTTCGATACGACACG    | 1,583-1,566   | Sequencing primer                   |
| SEQ903 <sup>1</sup>  | GTGGTTGGACACACCCCG    | 903-920       | Sequencing primer                   |
| SEQ1980 <sup>1</sup> | TACCAGAAAGCCTCAGC     | 1,996-1,980   | Sequencing primer                   |
| SEQ1561 <sup>1</sup> | CTAACCGTGTCGTATCG     | 1,561-1,577   | Sequencing primer                   |
| SEQ2786 <sup>1</sup> | CCATGCCGAACCTGGATAC   | 2,803-2,786   | Sequencing primer                   |
| SEQ1702 <sup>2</sup> | CGCTAATGGGCTAGACAC    | 1,702-1,719   | Sequencing primer                   |
| SEQ3147 <sup>2</sup> | GGGCGATCAGAGTGAATC    | 3,147-3,130   | Sequencing primer                   |
| SEQ2679 <sup>1</sup> | CCTCATCTCATCGCTCCACC  | 2,679-2,698   | Sequencing primer                   |
| SEQ3504 <sup>1</sup> | GCCATGGGTAGAACTGG     | 3,520-3,504   | Sequencing primer                   |
| SEQ3018 <sup>1</sup> | AACTTCGTGAGCCACG      | 3,018-3,034   | Sequencing primer                   |
| SEQ4120 <sup>1</sup> | GTGTACCCATGAACGCCCTC  | 4,139-4,120   | Sequencing primer                   |
| SEQ4029 <sup>1</sup> | GTGCCTTTCCTGTGAGTC    | 4,029-4,046   | Sequencing primer                   |
| SEQ5136 <sup>1</sup> | AGCCAGCATGATGAACTG    | 5,153-5,136   | Sequencing primer                   |
| SEQ4664 <sup>2</sup> | TGCATACTGACCCAACACTG  | 4,683-4,664   | Sequencing primer                   |
| SEQ5210 <sup>1</sup> | CCACGGTTTAGGTATCCAGC  | 5,210-5,229   | Sequencing primer                   |
| SEQ5877 <sup>1</sup> | TACAGAGTGACATGTCCTGC  | 5,895-5,877   | Sequencing primer                   |
| SEQ4269 <sup>2</sup> | CCAACATACGCGCGGGCG    | 4,269-4,286   | Sequencing primer                   |
| SEQ4961 <sup>2</sup> | ACCATCCGACTCAGCATTTTC | 4,980-4,961   | Sequencing primer                   |
| SEQ4606 <sup>2</sup> | TGATTACGCAACCCAACC    | 4,606-4,623   | Sequencing primer                   |
| SEQ5928 <sup>2</sup> | ATTCAAACCGGGTCCACCTC  | 5,947-5,928   | Sequencing primer                   |
| SEQ5495 <sup>2</sup> | ATCGTCGATTACCGTGGTCG  | 5,495-5,514   | Sequencing primer                   |

|                                              |                              |               |                                     |
|----------------------------------------------|------------------------------|---------------|-------------------------------------|
| SEQ6663 <sup>2</sup>                         | CAATGACCCGTACAGTCG           | 6,680-6,663   | Sequencing primer, detection primer |
| RACE1                                        | GATGGCAGCAGTAGTGTA           | 457-440       | 5'RACE primer                       |
| RACE2                                        | CACTACTCGGACTGTTTC           | 542-525       | 5'RACE primer                       |
| RACE3                                        | TCTCCAGGAGCACACCGGGC         | 219-200       | 5'RACE primer                       |
| RACE4                                        | CGTGTGCTATGCTCATAC           | 5,454-5,437   | 5'RACE primer                       |
| RACE5                                        | TGTTAGTGATGGGTCTGG           | 5,594-5,577   | 5'RACE primer                       |
| RACE6                                        | GCAAGTGTGCAGACGCGGCG         | 5,873-5,854   | 5'RACE primer                       |
| PpIRV1_qPCR_F1                               | GAACCCGAAACAGTCCGAGT         | 434-453       | Diagnostic primer                   |
| PpIRV1_qPCR_R1                               | AGAACCCACCGAAGTTAGCG         | 596-577       | Diagnostic primer                   |
| PpIRV1_probe1 <sup>5</sup>                   | TGCTGCCATCCTCGTTTTCTTCGCG    | 533-557       | Diagnostic probe                    |
| PpIRV1_qPCR_F2                               | GCTCGGTTGTCGGTTTTTCC         | 4,186-4,205   | Diagnostic primer                   |
| PpIRV1_qPCR_R2                               | AGACCACATTTGCGAGCGTA         | 4,328-4,309   | Diagnostic primer                   |
| PpIRV1_qPCR_F3                               | GATACCCGGACAGGCTGATG         | 5,366-5,385   | Diagnostic primer                   |
| PpIRV1_qPCR_R3                               | CGACCACGGTAATCGACGAT         | 5,527-5,508   | Diagnostic primer                   |
| <sup>3,4</sup> PhyG-F2                       | CGTGGAATCATAATCCT            | 7,524-7,541   | Diagnostic primer                   |
| <sup>3,4</sup> PhyG-Rb                       | CAGATTATGAGCCTGATAAG         | 7,745-7,726   | Diagnostic primer                   |
| <sup>3,4</sup> TrnM_PhyG_probe2 <sup>6</sup> | ATRTTGTAGGTTCAARTCCTAYCATCAT | 7,543-7,570   | Diagnostic probe                    |
| <sup>3,4</sup> PhyP_ATP9_F1                  | AGTAAGTATTTACGTATCCA         | 28,465-28,484 | Diagnostic primer                   |
| <sup>3,4</sup> PhyP_ATP9_R1                  | GAAATCCTTCTTTACAACAAG        | 28,654-28,634 | Diagnostic primer                   |

<sup>1</sup>Primer was used for NZ1 PpIRV1 dsRNA sequencing. Primer position is given relative to the reference PpIRV1\_4018.

<sup>2</sup>Primer was used for NZ2 PpIRV1 dsRNA sequencing. Primer position is given relative to the reference PpIRV1\_3052.

<sup>3</sup>Primers and probe are originated from Bilobeau et al. (2014).

<sup>4</sup>Primer position is given relative to the reference NZFS3000 *P. pluvialis* mitogenome.

<sup>5</sup>The probe was labeled with the fluorescent dye FAM.

<sup>6</sup>The probe was labeled with the fluorescent dye Quasar 705.

**Table S3.** The optimized reaction of RT-qPCR for *Phytophthora pluvialis* RNA virus 1 detection. The RT-qPCR targets both virus and host sequences in a single reaction. Details of primers and probes are listed in **Table S2**.

| Component                          |                        | Volume per 20 µL reaction |
|------------------------------------|------------------------|---------------------------|
| iTaQ Universal Probes rxn Mix (2×) |                        | 10 µL                     |
| iScript Reverse Transcriptase      |                        | 0.5 µL                    |
| Virus                              | 10 µM PplRV1_qPCR_F1   | 0.8 µL (400 nM)           |
|                                    | 10 µM PplRV1_qPCR_F1   | 0.8 µL (400 nM)           |
|                                    | 10 µM PplRV1_probe1    | 0.5 µL (250 nM)           |
| Host                               | 10 µM PhyG-F2          | 1 µL (500 nM)             |
|                                    | 10 µM PhyG-Rb          | 1 µL (500 nM)             |
|                                    | 10 µM TrnM_PhyG_probe2 | 0.5 µL (250 nM)           |
| Nuclease-free H <sub>2</sub> O     |                        | 2.9 µL                    |
| RNA template                       |                        | 2 µL                      |

**Table S4.** A panel of *Phytophthora/Nothophytophthora* isolates used for the virus screen, including 25 *Phytophthora pluvialis* isolates, nine other *Phytophthora* species/isolates and one *Nothophytophthora* species. NZFS isolates were sourced from Scion (Rotorua, New Zealand). International Collection of Microorganisms from Plants (ICMP) isolates were sourced from Manaaki Whenua – Landcare Research (Auckland, New Zealand).

| Isolate     | Species                                   | Geographical location | Host                          |
|-------------|-------------------------------------------|-----------------------|-------------------------------|
| ICMP 19002  | <i>P. multivora</i>                       | Auckland              | <i>Sophora</i> spp.           |
| ICMP 21309  | <i>P. amnicola</i> × <i>chlamydospora</i> | Auckland              | Unknown                       |
| ICMP 21668  | <i>P. cryptogea</i>                       | South Canterbury      | <i>Hebe</i> spp.              |
| ICMP 21670  | <i>P. cryptogea</i>                       | Auckland              | <i>Agathis australis</i>      |
| ICMP 21671  | <i>P. multivora</i>                       | Bay of Plenty         | <i>Araucaria heterophylla</i> |
| NZFS 119.03 | <i>P. cactorum</i>                        | Bay of Plenty         | <i>Meryta sinclaririi</i>     |
| NZFS 3859   | <i>P. cactorum</i>                        | Bay of Plenty         | <i>Diospyros</i> sp.          |
| NZFS 3003   | <i>P. pluvialis</i>                       | Rangitikei            | <i>Pinus radiata</i>          |
| NZFS 3092   | <i>P. pluvialis</i>                       | Waikato               | <i>Pinus radiata</i>          |
| NZFS 3565   | <i>P. pluvialis</i>                       | Hawke's Bay           | <i>Pinus radiata</i>          |
| NZFS 3612   | <i>P. pluvialis</i>                       | Hawke's Bay           | <i>Pinus radiata</i>          |
| NZFS 3618   | <i>P. pluvialis</i>                       | Wellington            | <i>Pinus radiata</i>          |
| NZFS 3620   | <i>P. pluvialis</i>                       | Rangitikei            | <i>Pinus radiata</i>          |
| NZFS 3689   | <i>P. pluvialis</i>                       | Wanganui              | <i>Pinus radiata</i>          |
| NZFS 3690   | <i>P. pluvialis</i>                       | Rangitikei            | <i>Pinus radiata</i>          |
| NZFS 3697   | <i>P. pluvialis</i>                       | Gisborne              | <i>Pseudotsuga menziesii</i>  |
| NZFS 3701   | <i>P. pluvialis</i>                       | Hawke's Bay           | <i>Pseudotsuga menziesii</i>  |
| NZFS 3859   | <i>P. cactorum</i>                        | Bay of Plenty         | <i>Diospyros</i> sp.          |
| NZFS 3881   | <i>P. pluvialis</i>                       | Wairarapa             | <i>Pseudotsuga menziesii</i>  |

|           |                                              |               |                              |
|-----------|----------------------------------------------|---------------|------------------------------|
| NZFS 3882 | <i>P. pluvialis</i>                          | Wairarapa     | <i>Pseudotsuga menziesii</i> |
| NZFS 3896 | <i>P. pluvialis</i>                          | Wellington    | <i>Pinus radiata</i>         |
| NZFS 3897 | <i>P. pluvialis</i>                          | Wellington    | <i>Pinus radiata</i>         |
| NZFS 3963 | <i>P. pluvialis</i>                          | Nelson        | <i>Pseudotsuga menziesii</i> |
| NZFS 3987 | <i>P. pluvialis</i>                          | Bay of Plenty | <i>Pinus radiata</i>         |
| NZFS 3993 | <i>P. pluvialis</i>                          | Nelson        | <i>Pseudotsuga menziesii</i> |
| NZFS 4001 | <i>P. pluvialis</i>                          | Nelson        | <i>Pseudotsuga menziesii</i> |
| NZFS 4002 | <i>P. pluvialis</i>                          | Nelson        | <i>Pseudotsuga menziesii</i> |
| NZFS 4020 | <i>P. pluvialis</i>                          | Bay of Plenty | <i>Pinus radiata</i>         |
| NZFS 4034 | <i>P. pluvialis</i>                          | Nelson        | <i>Pinus radiata</i>         |
| NZFS 4045 | <i>P. pluvialis</i>                          | Taupo         | <i>Pinus radiata</i>         |
| NZFS 4171 | <i>P. pluvialis</i>                          | Taupo         | <i>Pinus radiata</i>         |
| NZFS 4273 | <i>P. pluvialis</i>                          | Taupo         | <i>Pinus radiata</i>         |
| NZFS 4293 | <i>P. pluvialis</i>                          | Taranaki      | <i>Pinus radiata</i>         |
| NZFS 4311 | <i>P. amnicola</i> ×<br><i>chlamydospora</i> | Bay of Plenty | Unknown                      |
| NZFS 4487 | <i>Nothophytophthora</i><br>sp.              | Unknown       | Unknown                      |
| NZFS 4591 | <i>P. amnicola</i> ×<br><i>themophila</i>    | Northland     | <i>Pinus radiata</i>         |
